# Supplementary material for: Vaccine efficacy and T helper cell differentiation change with aging
Source: PubMed Central journal article supplement (PMC5085104; doi:10.18632/oncotarget.9254), 2016-05-09
Supplement: oncotarget-07-33581-s001.pdf [file oncotarget-07-33581-s001.pdf]

# Vaccine efficacy and T helper cell differentiation change with aging

## Supplementary Material

### A. Higher in aged groups

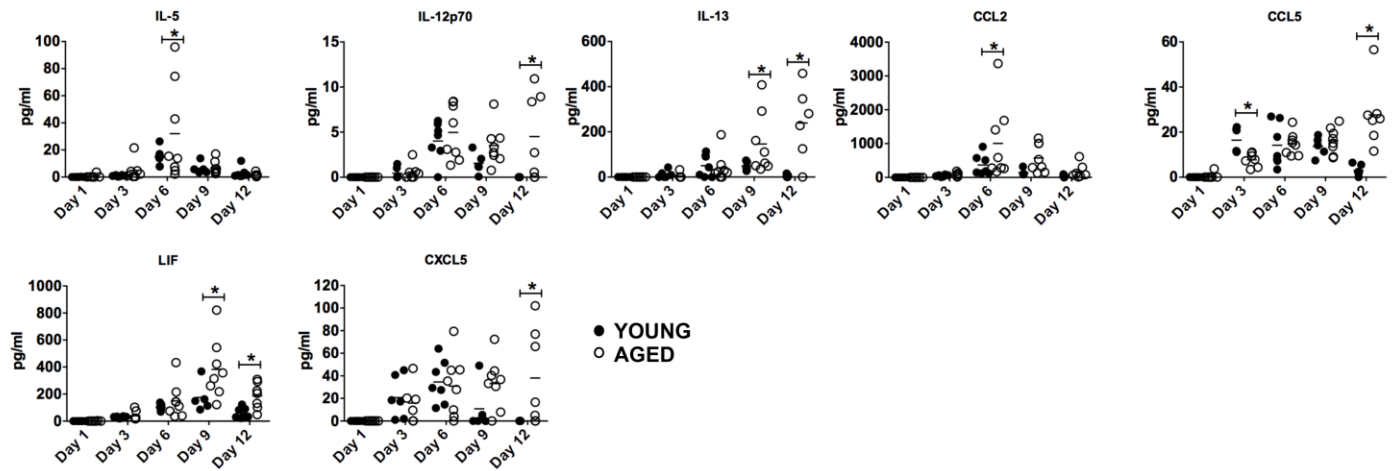

### B. Delayed in aged groups

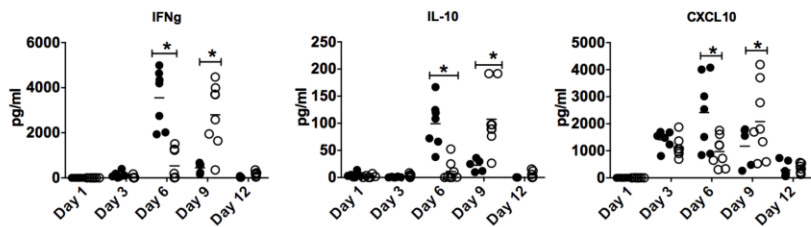

### C. Higher in young groups

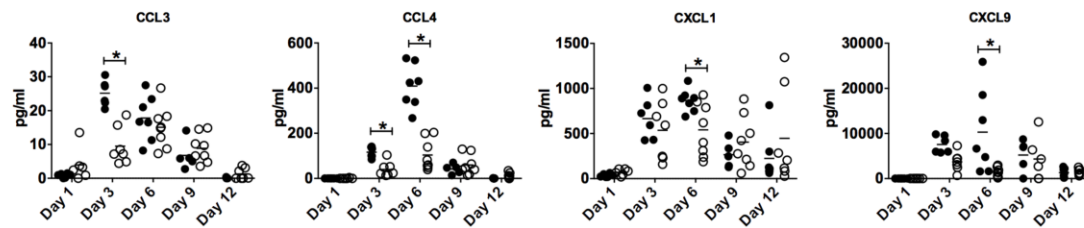

SUPPLEMENTARY FIG 1. Additional cytokines and chemokines measured by multiplex assay of samples in Fig 1C.

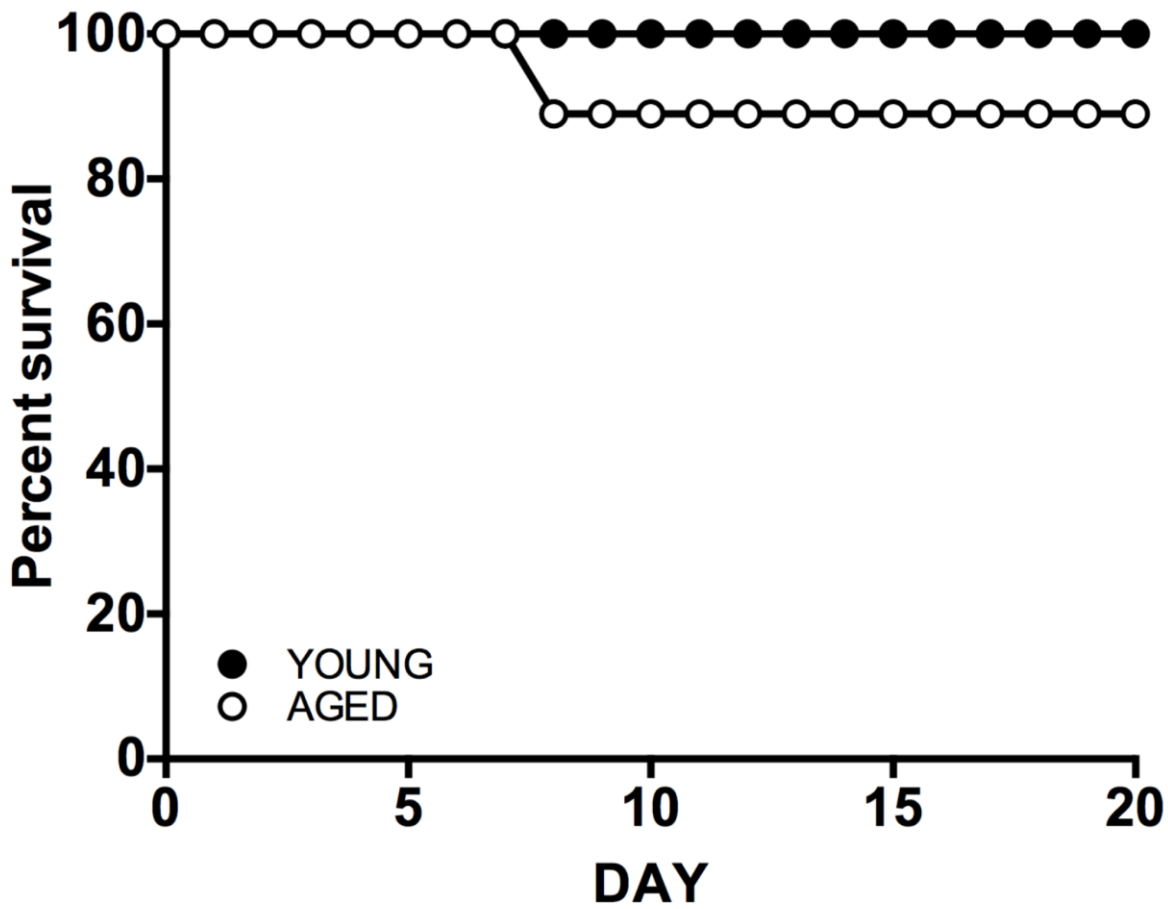

**SUPPLEMENTARY FIG 2.** Survival of young and aged mice given 250 CFU of *Streptococcus pneumoniae*.

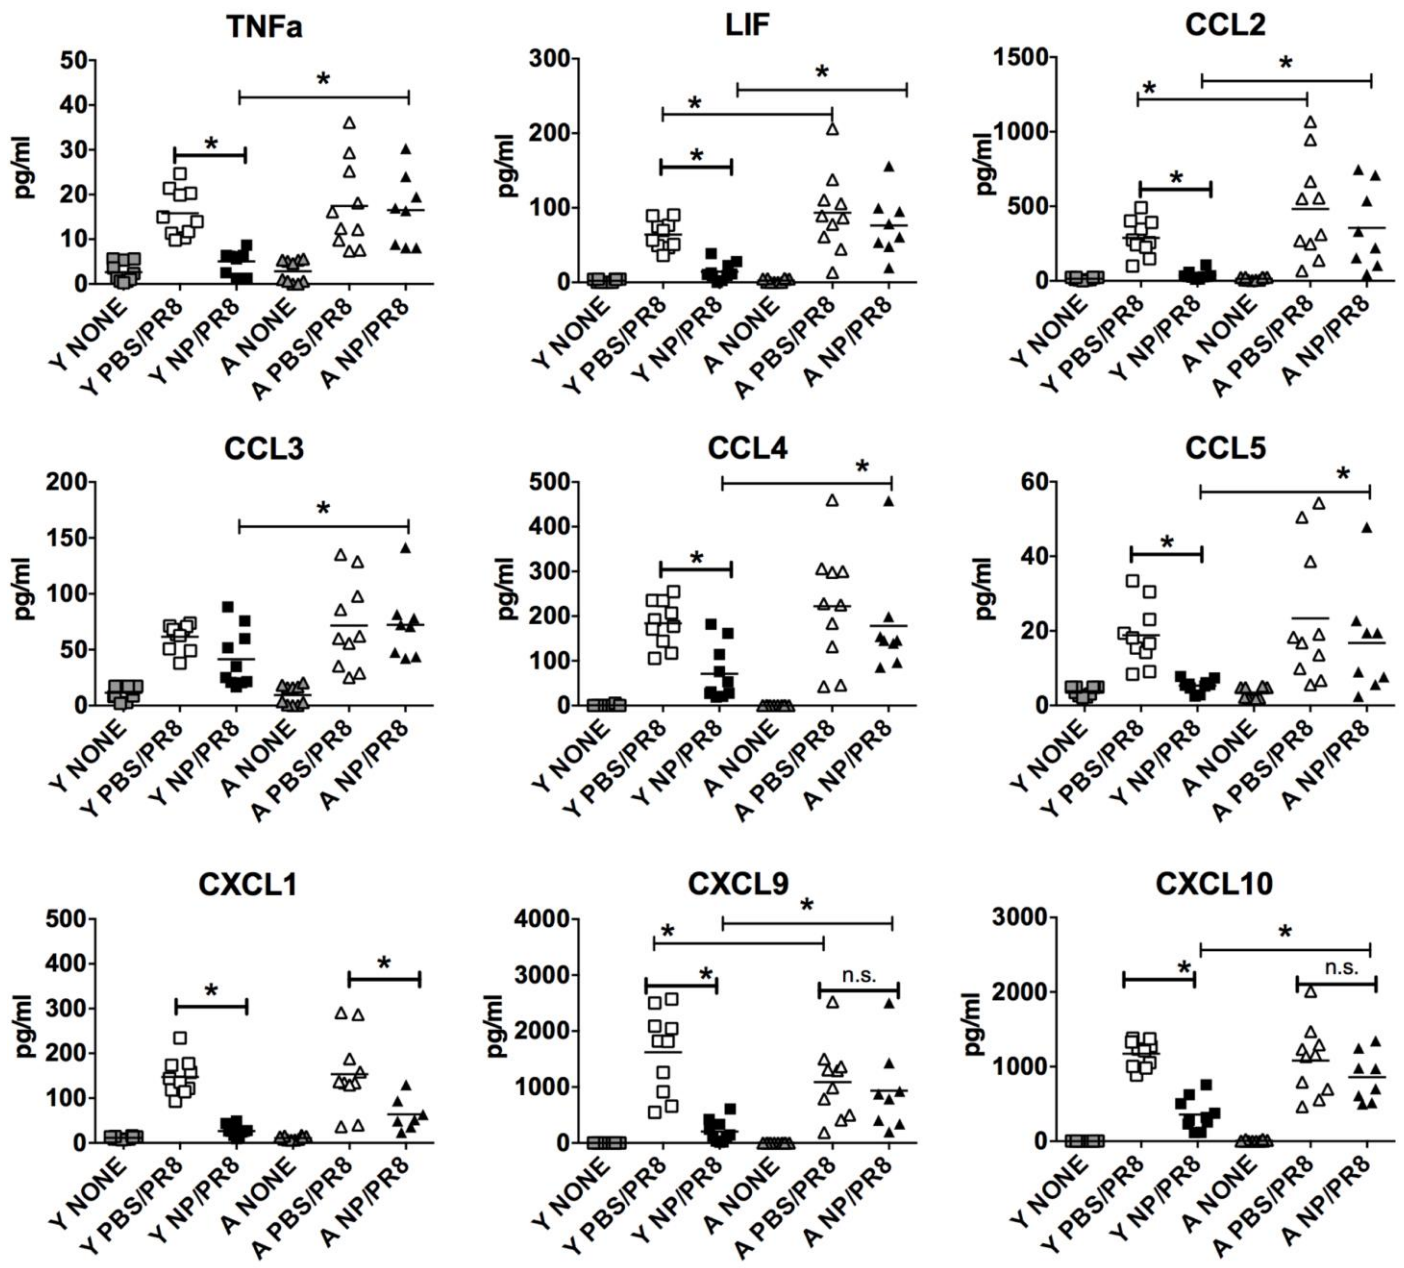

**SUPPLEMENTARY FIG 3.** Additional cytokines and chemokines measured by multiplex assay of samples in Fig 3D.

**A. Representative FACS plot of NP+CD4+ T cells**

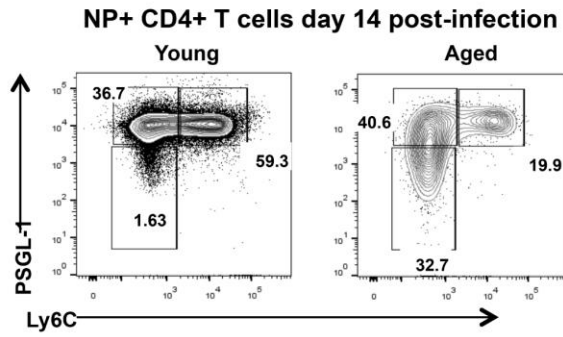

**B. Splenic T cell numbers during flu infection**

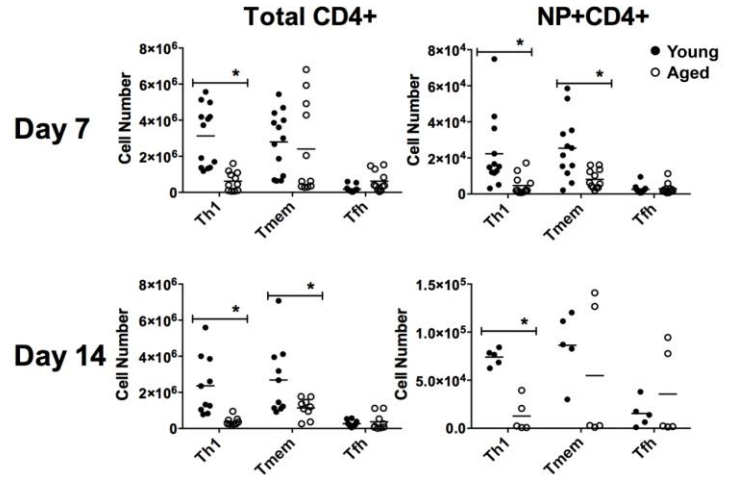

**C. Increased Tfh (CXCR5+PD-1+) in aged mice**

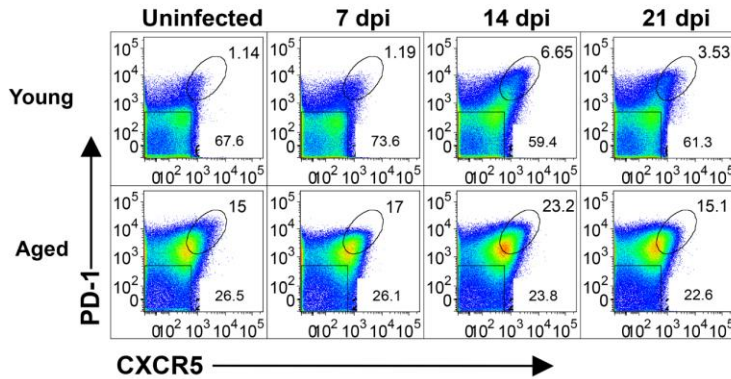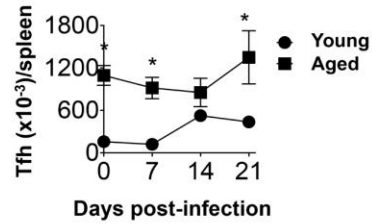

**SUPPLEMENTARY FIG 4.** Additional information on CD4 T cells in Figure 5. (A) Representative FACS plot of splenic NP+CD4 T cells on day 14 of influenza infection. (B) Cell numbers of graphs presented in Figure 5C. (C) Kinetic analysis of Tfh (CXCR5+PD-1+) within the total CD4 T cell population in spleens of young and aged mice during influenza infection. Representative FACS dot plots and graphical representation of cell numbers are shown.
